# Supplementary material for: NiCo (oxy)selenide electrocatalysts via anionic regulation for high-performance lithium–sulfur batteries
Source: Royal Society of Chemistry journal article supplement (doi:10.1039/d1ta10723b), 2022-01-01
Supplement: d1ta10723b1.pdf [file d1ta10723b1.pdf]

## Supporting Information

# NiCo (oxy)selenide Electrocatalyst via Anionic Regulation for High-performance Lithium-Sulfur Batteries

*Yong Li<sup>a</sup>, Xuzhen Wang<sup>\*, a</sup>, Minghui Sun<sup>a</sup>, Zongbin Zhao<sup>a</sup>, Zhiyu Wang<sup>a</sup> and Jieshan*

*Qiu<sup>a, b</sup>*

a State Key Laboratory of Fine Chemicals, Liaoning Key Laboratory for Energy Materials and Chemical Engineering, School of Chemical Engineering, Dalian University of Technology, Dalian 116024, China.

b College of Chemical Engineering, Beijing University of Chemical Technology, Beijing 100029, China.

\*Corresponding authors:

Xuzhen Wang

E-mail: xzwang@dlut.edu.cn

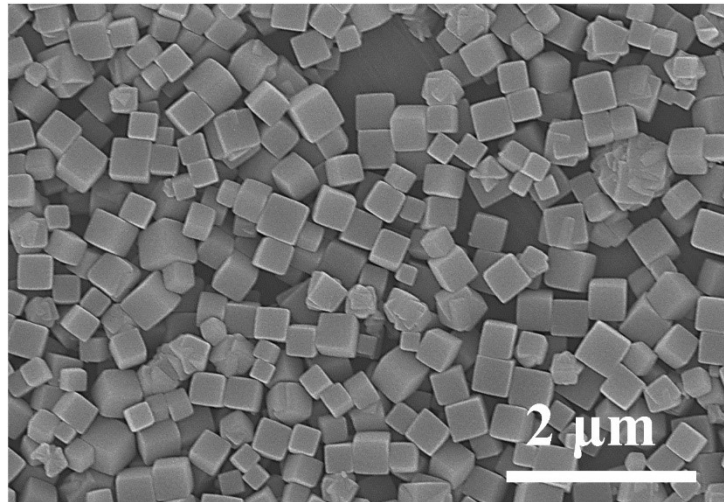

**Fig. S1** SEM image of the cubic ZIF-67 crystals showing the purity and uniformity of the product.

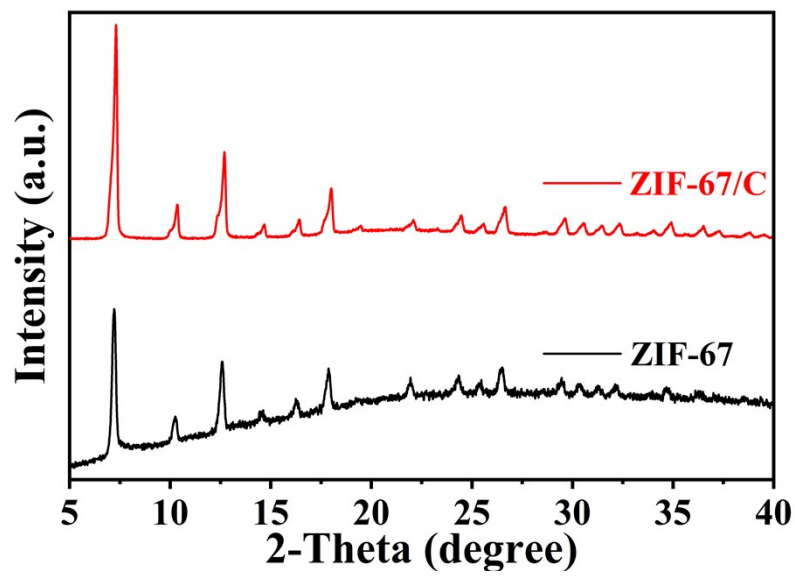

**Fig. S2** XRD patterns of ZIF-67 cubes and ZIF-67/C composites.

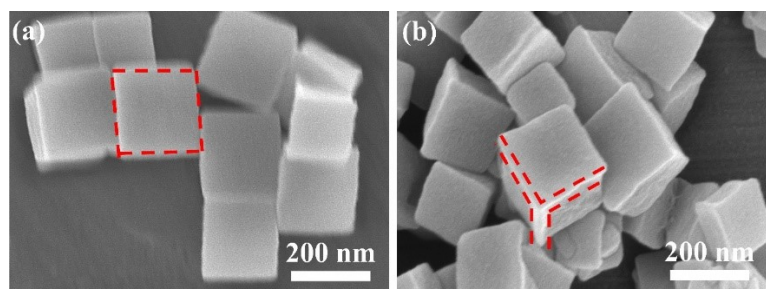

**Fig. S3** SEM images of (a) ZIF-67 and (b) ZIF-67/C.

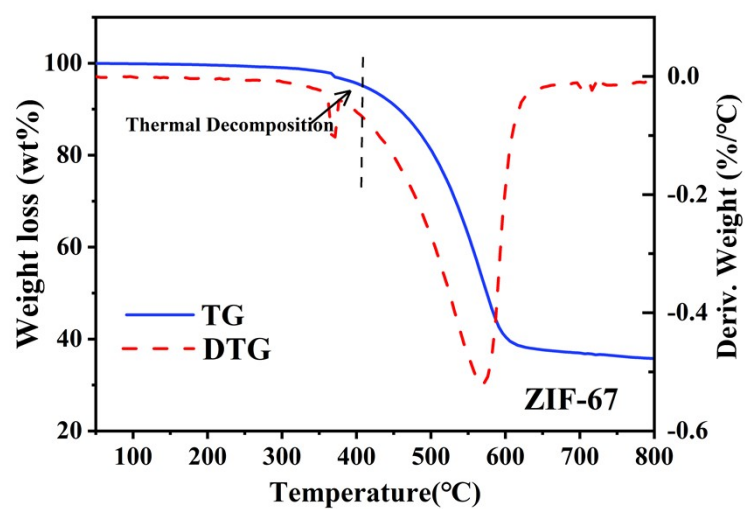

Fig. S4 TGA and DTA curves for ZIF-67.

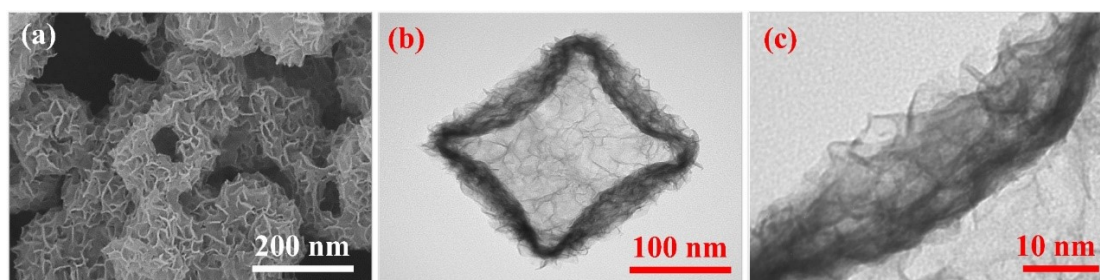

Fig. S5 (a) SEM image and (b, c) TEM images of NiCo-LDH/C.

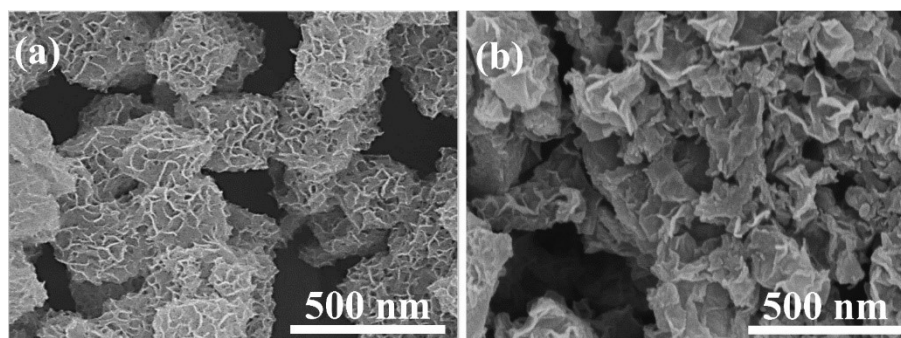

Fig. S6 SEM images of (a) NiCo-LDH/C and (b) NiCo-LDH.

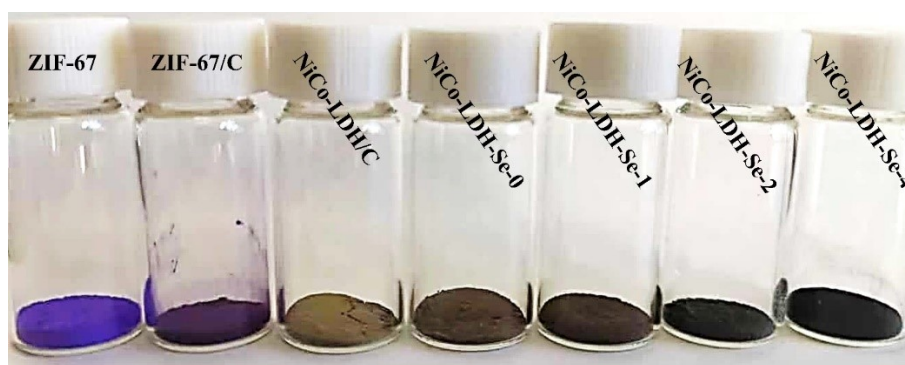

**Fig. S7** Digital photos of various products. From left to right: ZIF-67, ZIF-67/C, NiCo-LDH/C, NiCo-LDH-Se-0, NiCo-LDH-Se-1, NiCo-LDH-Se-2 and NiCo-LDH-Se-4.

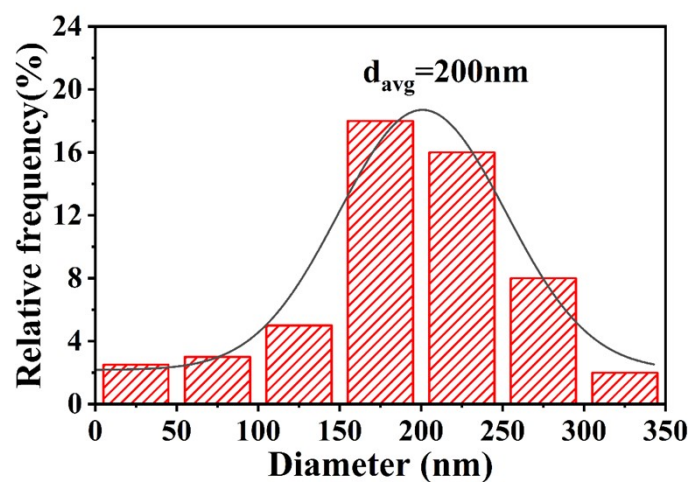

**Fig. S8** Histograms showing the size distribution of NiCo-LDH-Se-2.

**Table S1** Atomic percentages of the elements in NiCo-LDH-Se-x calculated from XPS survey spectra.

| Sample<br>Element (at. %) | Sample        |               |               |               |
|---------------------------|---------------|---------------|---------------|---------------|
|                           | NiCo-LDH-Se-0 | NiCo-LDH-Se-1 | NiCo-LDH-Se-2 | NiCo-LDH-Se-4 |
| Co                        | 11.3          | 12.1          | 11.6          | 11.1          |
| Ni                        | 24.8          | 24.3          | 24.4          | 21.1.         |
| C                         | 11.5          | 11.6          | 10.3          | 9.8           |
| O                         | 49.0          | 40.2          | 37.2          | 24.6          |
| N                         | 3.4           | 3.6           | 3.2           | 3.2           |
| Se                        | -             | 8.2           | 13.3          | 30.2          |

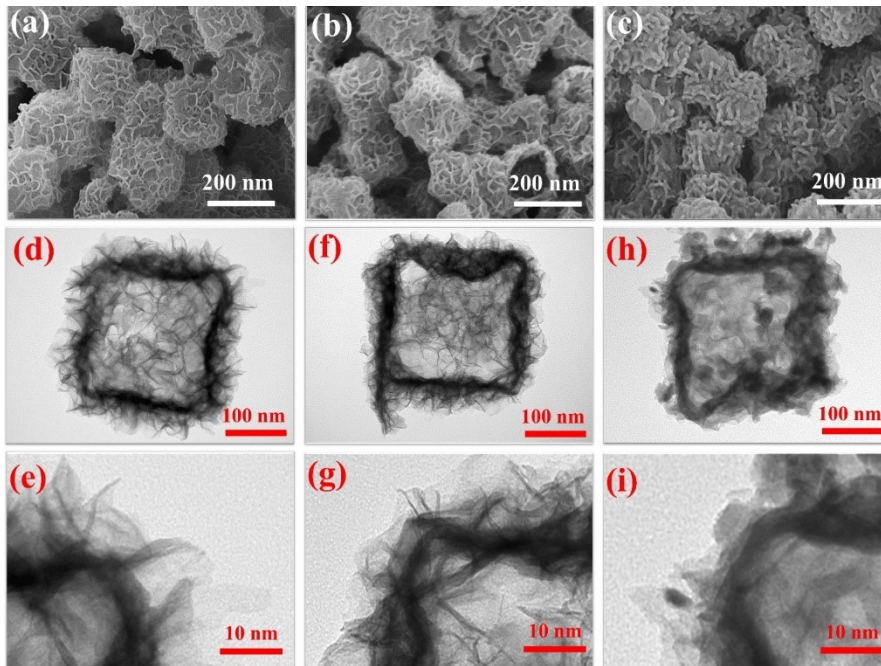

**Fig. S9** SEM image of NiCo-LDH-Se-0 (a), NiCo-LDH-Se-1 (b) and NiCo-LDH-Se-4(c). TEM images of NiCo-LDH-Se-0 (d, e), NiCo-LDH-Se-1 (f, g) and NiCo-LDH-Se-4(h, i).

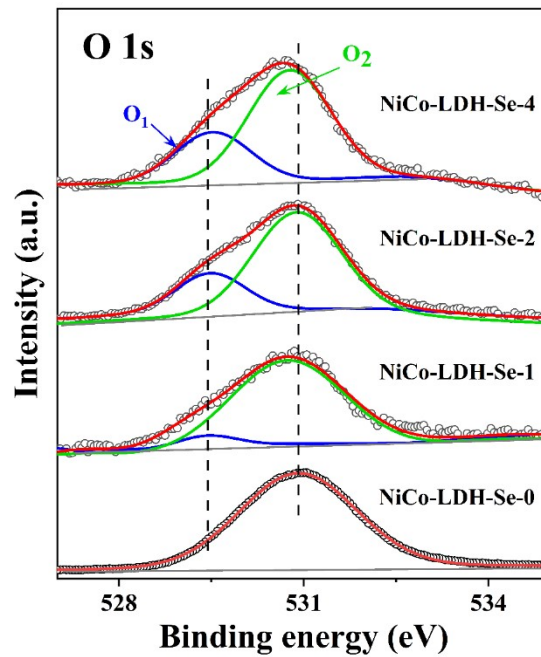

**Fig. S10** High resolution O 1s XPS spectra of NiCo-LDH-Se-x electrocatalysts.

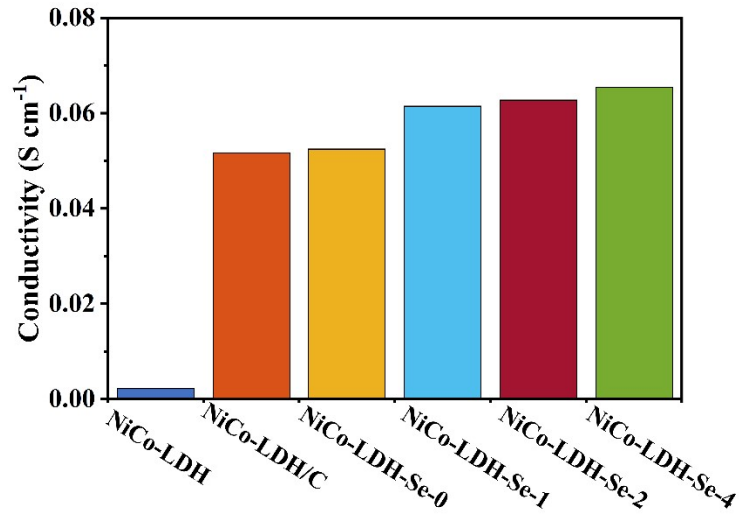

**Fig. S11** Electrical conductivity of NiCo-LDH, NiCo-LDH/C and NiCo-LDH-Se-x.

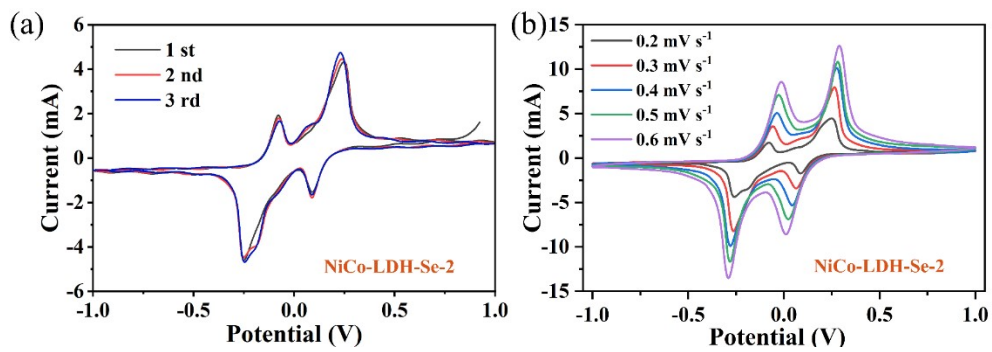

**Fig. S12** CV profiles of the symmetric cell with NiCo-LDH-Se-2 electrodes (a) at 0.2 mV s<sup>-1</sup> and (b) at different current densities.

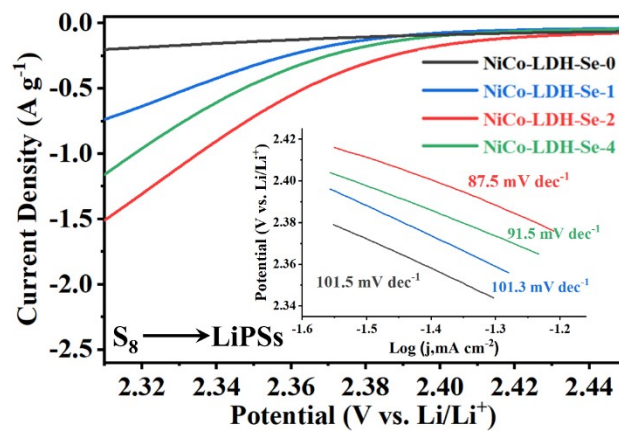

**Fig. S13** Potentiostatic polarization curves from the LSV measurements of NiCo-LDH-Se-x with the derived Tafel plots as insets on the first reduction processes.

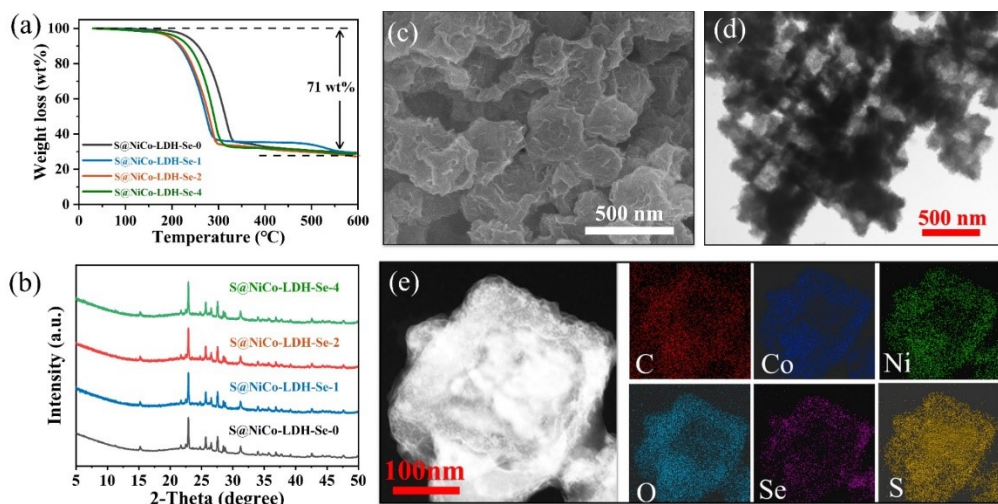

**Fig. S14** (a) TGA curves, (b) XRD patterns of S@NiCo-LDH-Se-x. (c) SEM image, (d) TEM image, (e) STEM image and the corresponding elemental mappings of S@NiCo-LDH-Se-2 composite.

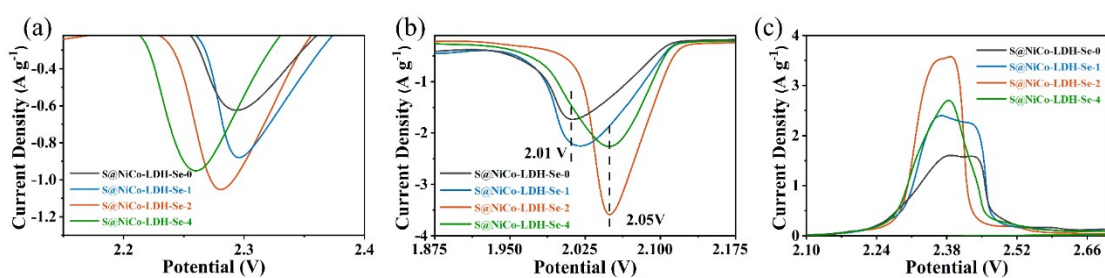

**Fig. S15** (a, b) Cathodic peak at 2.3 V (a), 2.05 V (b) and (c) anodic peak of the cell with S@NiCo-LDH-Se-x.

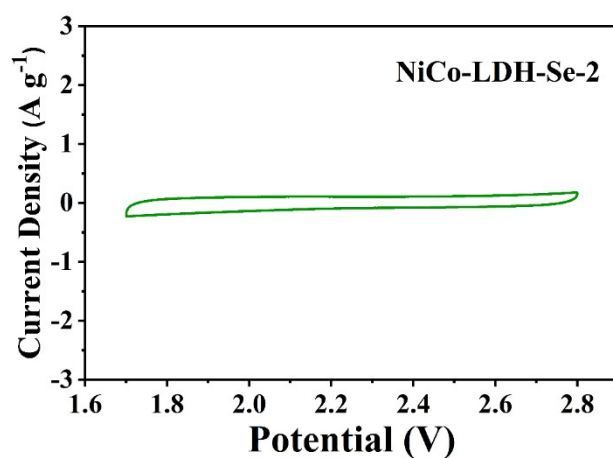

**Fig. S16** CV curves of the cell with NiCo-LDH-Se-2 at a scanning rate of  $0.1 \text{ mV s}^{-1}$  from 2.8 to 1.7 V

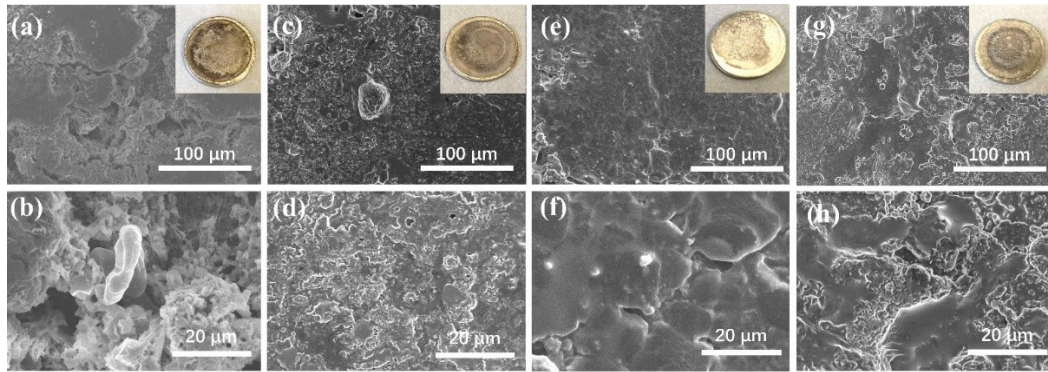

**Fig. S17** SEM images and optical photographs of lithium anodes in the cells with (a, b) S@NiCo-LDH-Se-0, (c, d) S@NiCo-LDH-Se-1, (e, f) S@NiCo-LDH-Se-2, and (g, h) S@NiCo-LDH-Se-4 cathodes after 100 cycles at 0.2 C.

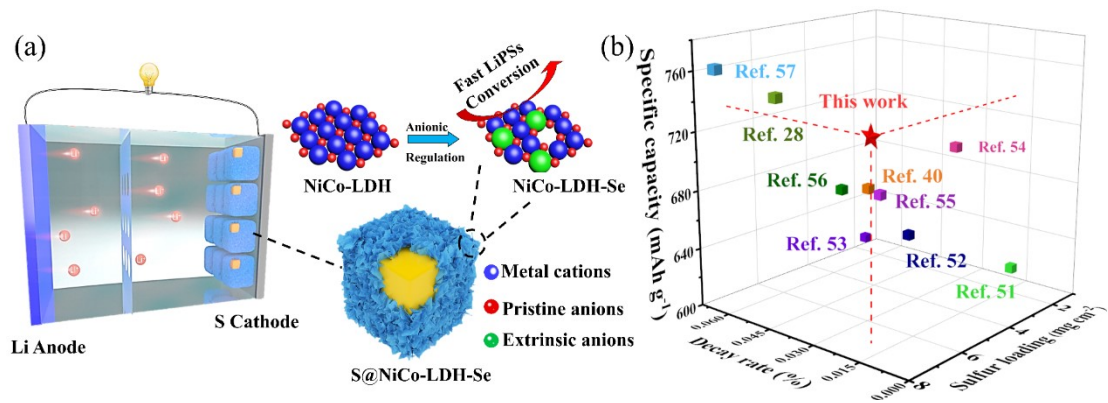

**Fig. S18** (a) Schematic illustration of chemical adsorption and catalytic effect for polysulfides in S@NiCo-LDH-Se electrode. (b) Performance comparison between S@NiCo-LDH-Se-2 electrode and LDH-based or CoSe-based cathode materials.



**Table S2.** Comparison of electrochemical performance of S@NiCo-LDH-Se cathode for Li-S batteries with present state-of-the-art LDH and CoSe-based cathode materials.

| Host material                                    | Capacity (mAh g <sup>-1</sup> ) (Low rate) | Capacity (mAh g <sup>-1</sup> ) (High rate) | Cycling stability (%) (Times, Low rate) | Decay rate (percycle, %) (Times, High rate) | S content (wt.%) |
|--------------------------------------------------|--------------------------------------------|---------------------------------------------|-----------------------------------------|---------------------------------------------|------------------|
| <b>NiCo-LDH-Se (This work)</b>                   | <b>1332 (0.2 C)</b>                        | <b>733 (4.0 C)</b>                          | <b>88.1 (100, 0.2 C)</b>                | <b>0.020 (1000, 2.0 C)</b>                  | <b>71.0</b>      |
| LDH/Co <sub>9</sub> S <sub>8</sub> <sup>40</sup> | 1339 (0.1C)                                | 670 (2.0 C)                                 | 52.0 (500, 0.1C)                        | 0.047 (1500, 1.0 C)                         | 79.0             |
| LDH/rGo <sup>51</sup>                            | 958 (0.2C)                                 | 502 (2.0 C)                                 | 60.0 (100, 0.2 C)                       | 0.023 (200, 1.0 C)                          | 64.0             |
| NiCo-LDH@rGO <sup>52</sup>                       | 1336 (0.1 C)                               | 713 (2.0 C)                                 | 74.8 (100, 0.1C)                        | 0.030 (800, 2.0 C)                          | 66.0             |
| NiAl@PAB <sup>53</sup>                           | 1216 (0.2C)                                | 614 (3.0 C)                                 | 65.0 (200, 0.5 C)                       | 0.133 (300, 1.0 C)                          | 66.0             |
| LDH/S/rGo <sup>54</sup>                          | 1226 (0.2C)                                | 700 (2.0 C)                                 | 53.0 (200, 0.2 C)                       | 0.029 (1000, 2.0 C)                         | 61.7             |
| Ni/Fe LDH <sup>55</sup>                          | 1091 (0.2C)                                | 633 (2.0 C)                                 | 66.3 (200, 0.1C)                        | 0.041 (1000, 1.0 C)                         | 70.0             |
| CNT-LDH/Ar <sup>56</sup>                         | 1294 (0.1 C)                               | 524 (5.0 C)                                 | 87.4 (100, 0.1C)                        | 0.042 (500, 1.0 C)                          | 72.0             |
| CS@HPP <sup>28</sup>                             | 1057 (0.2C)                                | 754 (3.0 C)                                 | 83.3 (100, 0.2C)                        | 0.040 (1200, 1.0 C)                         | 72.0             |
| N-CoSe <sub>2</sub> <sup>57</sup>                | 1341 (0.2 C)                               | 780 (5.0 C)                                 | 68.9 (250, 0.2 C)                       | 0.037 (500, 2.0 C)                          | 70.0             |

#### References:

28. Z. Ye, Y. Jiang, L. Li, F. Wu and R. Chen, *Advanced Materials*, 2020, **32**, e2002168.
40. S. Chen, J. Luo, N. Li, X. Han, J. Wang, Q. Deng, Z. Zeng and S. Deng, *Energy Storage Materials*, 2020, **30**, 187-195.
51. F. Xu, C. Dong, B. Jin, H. Li, Z. Wen and Q. Jiang, *Journal of Electroanalytical Chemistry*, 2020, **876**, 114545.
52. W. Qiu, G. Li, D. Luo, Y. Zhang, Y. Zhao, G. Zhou, L. Shui, X. Wang and Z. Chen, *Advanced Science*, 2021, **8**, 2003400.
53. S. Chen, Z. Wu, J. Luo, X. Han, J. Wang, Q. Deng, Z. Zeng and S. Deng, *Electrochimica Acta*, 2019, **312**, 109-118.
54. S. Liu, X. Zhang, S. Wu, X. Chen, X. Yang, W. Yue, J. Lu and W. Zhou, *ACS Nano*, 2020, **14**, 8220-8231.
55. J. Zhang, Z. Li, Y. Chen, S. Gao and X. W. D. Lou, *Angewandte Chemie International Edition*, 2018, **57**, 10944-10948.
56. C. Li, Y. Zhao, Y. Zhang, D. Luo, J. Liu, T. Wang, W. Gao, H. Li and X. Wang, *Chemical Engineering Journal*, 2021, **417**, 129248.
57. M. Wang, L. Fan, X. Sun, B. Guan, B. Jiang, X. Wu, D. Tian, K. Sun, Y. Qiu, X. Yin, Y. Zhang and N. Zhang, *ACS Energy Letters*, 2020, **5**, 3041-3053.
